# Supplementary material
Source: PubMed Central journal article supplement (PMC7371522)

## S1. Red blood cell counts are not impacted by PGDHi monotherapy

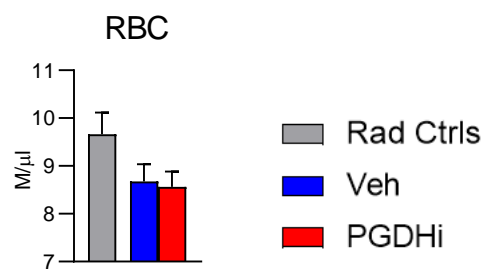

## S2. PGDHi does not significantly impact inflammatory factors in the serum

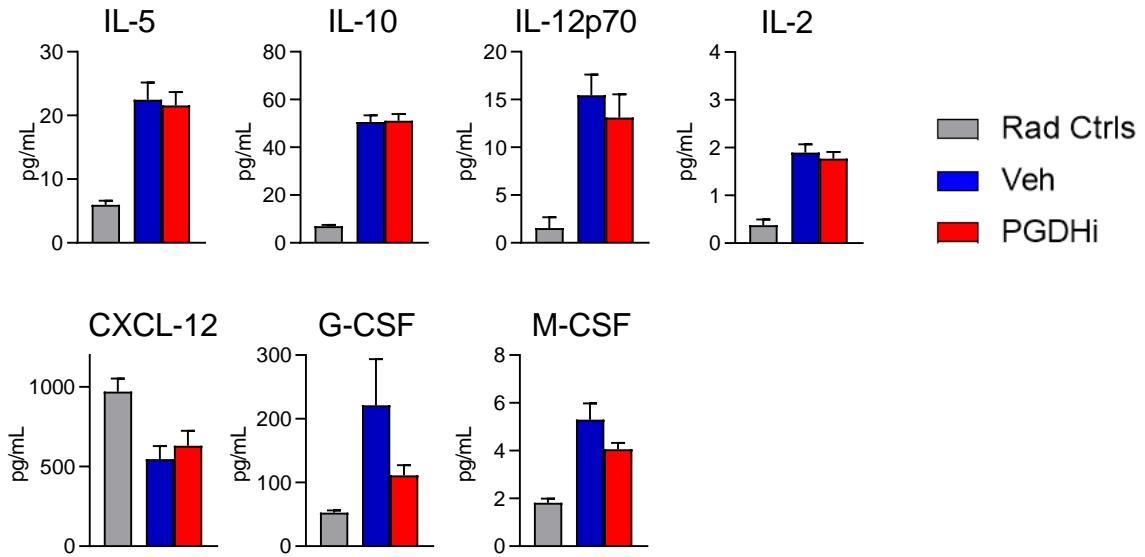

### S3. PGDHi treatment does not reduce T cell expression of activation markers

A

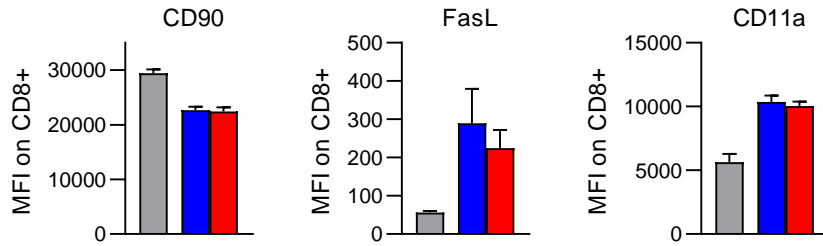

B

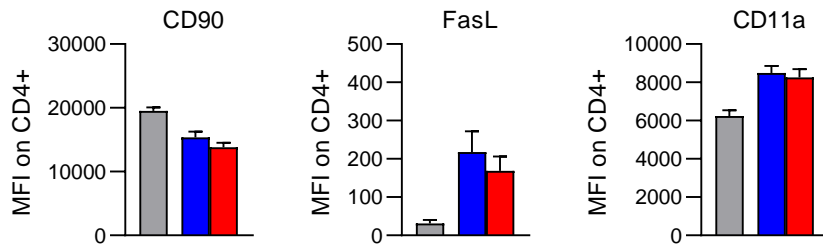

## S4. 10mg/kg cyclosporine A is subtherapeutic but has better liver tolerability than standard dose

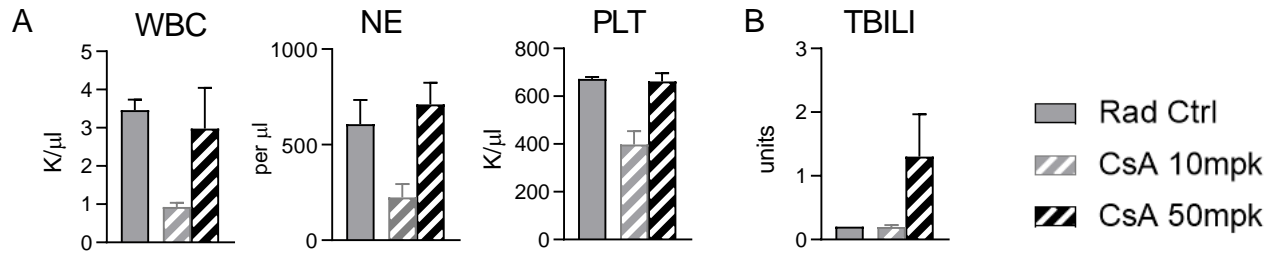

## S5. PGDHi attenuates phenotypic HSC depletion

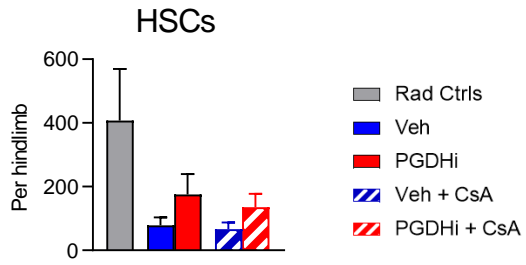

## S6. Dual PGDHi and low dose CsA does not impact serum IFN $\gamma$

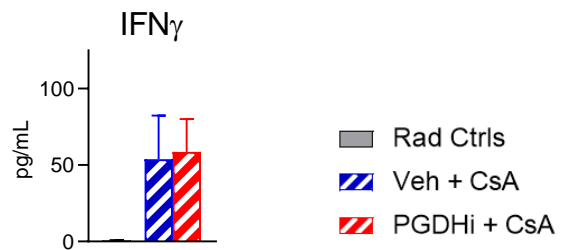

Supplement: NIHMS1596660-supplement-1.pdf [file NIHMS1596660-supplement-1.pdf]
